## **Interspecies Social Spreading: Interaction between two sessile soil bacteria leads to emergence of surface motility**

Running title: Interspecies social spreading as an emergent trait

Lucy M. McCully<sup>a</sup>, Adam S. Bitzer<sup>a</sup>, Sarah C. Seaton<sup>b</sup>, Leah M. Smith<sup>a</sup>, Mark W. Silby<sup>a#</sup>

<sup>a</sup>Department of Biology, University of Massachusetts Dartmouth, North Dartmouth, MA

<sup>b</sup>Department of Biology, University of North Carolina Asheville, Asheville, NC

Present addresses:

Leah M. Smith

Department of Microbiology and Immunology, University of Otago, Dunedin, New Zealand

Sarah C. Seaton

Indigo Agriculture, 500 Rutherford Avenue, Charlestown, MA, USA

#For correspondence

Mark Silby

Department of Biology

University of Massachusetts Dartmouth

285 Old Westport Road

North Dartmouth

MA 02747

Phone: +1-508-999-8364

Fax: +1-508-999-8196

Email: [mark.silby@umassd.edu](mailto:mark.silby@umassd.edu)

Word count (Abstract): 196

Word count (Importance): 159

Word count (text): 4,079 [5,760 including Methods]

## 1 **Abstract**

2 Bacteria often live in complex communities in which they interact with other organisms.  
3 Consideration of the social environment of bacteria can reveal emergent traits and behaviors  
4 that would be overlooked by studying bacteria in isolation. Here we characterize a social trait  
5 which emerges upon interaction between the distantly-related soil bacteria *Pseudomonas*  
6 *fluorescens* Pf0-1 and *Pedobacter* sp. V48. On hard agar, which is not permissive for motility of  
7 the mono-culture of either species, co-culture reveals an emergent phenotype we term  
8 'interspecies social spreading,' where the mixed colony spreads across the hard surface. We  
9 show that initiation of social spreading requires close association between the two species of  
10 bacteria. Both species remain associated throughout the spreading colony, with reproducible  
11 and non-homogenous patterns of distribution. The nutritional environment influences social  
12 spreading; no social behavior is observed under high nutrient conditions, but low nutrient  
13 conditions are insufficient to promote social spreading without high salt concentrations. This  
14 simple two-species consortium is a tractable model system that will facilitate mechanistic  
15 investigations of interspecies interactions and provide insight into emergent properties of  
16 interacting species. These studies will contribute to the broader knowledge of how bacterial  
17 interactions influence the functions of communities they inhabit.

## 18 **Importance**

19 The wealth of studies on microbial communities has revealed the complexity and  
20 dynamics of the composition of communities in many ecological settings. Fewer studies probe  
21 the functional interactions of the community members. Function of the community as a whole  
22 may not be fully revealed by characterizing the individuals. In our two-species model  
23 community, we find an emergent trait resulting from the interaction of the soil bacteria

24 *Pseudomonas fluorescens* Pf0-1 and *Pedobacter* sp. V48. Observation of emergent traits  
25 suggests there may be many functions of a community that are not predicted based on *a priori*  
26 knowledge of the community members. These types of studies will provide a more holistic  
27 understanding of microbial communities, allowing us to connect information about community  
28 composition with behaviors determined by interspecific interactions. These studies increase our  
29 ability to understand communities, such as the soil microbiome, plant-root microbiome, and  
30 human gut microbiome, with the final goal of being able to manipulate and rationally improve  
31 these communities.

## 32 **Introduction**

33           Within soils live a plethora of microbial species that form complex communities  
34 responsible for important ecological functions, such as nutrient cycling and plant health. Omics  
35 approaches have given us a wealth of information on the composition, diversity, metabolic  
36 potential, and ecology of plant- and soil-associated microbial communities (1, 2). However, to  
37 get a complete understanding of microbial functions and interactions within these environments,  
38 we must look at every layer, from the full community *in vivo* to the individual microbe *in vitro* (3).  
39 Historically, research has focused on the study of single species in pure culture, but bacteria are  
40 social organisms. Thus, the study of the mechanisms and consequences of multi-species  
41 interactions is necessary for us to understand the function of microbial communities as a whole.  
42 Investigating entire soil communities *in situ* presents considerable challenges because of  
43 fluctuating soil conditions and the wide range of relevant scales, ranging from particulate to  
44 ecological levels (2). Reducing the microbial community to pair-wise interactions or small  
45 consortia allows for a detailed mechanistic study. This reduction is also an essential link  
46 between studying isolated microbes in the laboratory and understanding the collective activities  
47 of natural microbial communities (4).

48           Recent work has considered the social environment of bacteria, investigating altered  
49 behaviors and production of secondary metabolites when co-cultured with other organisms.  
50 Some bacteria exhibit emergent behaviors when presented with other species, likely the result  
51 of induction of genes that are not expressed in pure culture. For example, some *Pseudomonas*  
52 *fluorescens* strains produce an antifungal compound during interactions with other species (5–  
53 9). The co-culture of different actinomycete species results in the production of secondary  
54 metabolites, changes in pigment, and sporulation (10–12). The presence of *E. coli* or  
55 *Pseudomonas* species effects sporulation and biofilm formation in *Bacillus subtilis* (13, 14). One

56 subset of social interactions are those which alter the motility behaviors and capabilities of other  
57 species. For example, physical association with *Saccharomyces cerevisiae* results in  
58 *Streptomyces venezuelae* consuming the yeast and triggers ‘exploratory growth’ of the bacteria  
59 (15). This exploration is not observed when *S. venezuelae* is grown in mono-culture, under the  
60 same environmental conditions. In another example, *B. subtilis* moves away from a  
61 *Streptomyces* competitor across a solid surface, but does not do so in isolation (16, 17). Other  
62 behaviors appear less competitive, where a motile species will travel with a non-motile species  
63 that can degrade antibiotics, allowing the consortium to colonize hostile environments (18, 19).  
64 *Xanthomonas perforans* can even change the behavior of *Paenibacillus vortex*, producing a  
65 signal that induces *P. vortex* to swarm towards it so it can hitchhike (20).

66 *Pseudomonas fluorescens* Pf0-1 and *Pedobacter* sp. V48 are known to interact through  
67 diffusible and volatile signals, which induce production of an antifungal compound by *P.*  
68 *fluorescens* (6–8). Previous studies with *Pedobacter* and a strain closely-related to *P.*  
69 *fluorescens* Pf0-1 (AD21) found that the mixture of the strains showed reciprocal gene  
70 expression changes and antagonistic behavior toward the plant pathogen *Rhizoctonia solani* (5,  
71 9). The initial study noted expansion of the mixed strains beyond the initial area of inoculation  
72 (5), but the phenotype was not characterized, and has not been the focus of any further studies.  
73 We investigated this observation using a new assay. Instead of culturing *P. fluorescens* Pf0-1  
74 and *Pedobacter* without contact, as was done in the antagonism assays (6), we mix them  
75 together. We hypothesized that, while antibiotic production can be induced at a distance through  
76 diffusible or volatile signals, the motility behavior requires close contact and is therefore  
77 controlled in a manner distinct from the other two forms of communication.

78 In this study, we describe an interaction between two distantly-related soil bacteria, *P.*  
79 *fluorescens* Pf0-1 (phylum: Proteobacteria) and *Pedobacter* sp. V48 (phylum: Bacteroidetes).  
80 This interaction produces an emergent behavior, which we term “interspecies social spreading,”

81 in which the bacteria move together across a hard agar surface. When grown in isolation,  
82 neither species moves beyond the typical amount of colony expansion. In co-culture, both  
83 bacteria are present throughout the spreading colony, and fluorescent imaging shows a non-  
84 homogenous distribution. We demonstrate that a close association between the colonies of both  
85 species is required for spreading to initiate and that the levels of nutrients and salts in the media  
86 affect the development of the spreading phenotype.

## 87 **Results**

### 88 **Interspecies social spreading arises when mixing two distantly-related bacteria**

89 In previous studies, antifungal activity was observed when *P. fluorescens* Pf0-1 and  
90 *Pedobacter* sp. V48 were cultured 15 mm apart (6). In addition to this interaction-induced trait,  
91 the possibility of motility was noted, but not further investigated, in a mixture of *P. fluorescens*  
92 AD21 and *Pedobacter* (5, 9). To explore this phenomenon, we developed an assay in which the  
93 induced motility is greater and more easily observed. Our approach differed from the conditions  
94 of the original observation in inoculation method, strain combination, and media composition.  
95 When we plated *P. fluorescens* Pf0-1 and *Pedobacter* on TSB-NK medium solidified with 2%  
96 agar a mixed colony of the two bacteria expanded across the surface of the agar, an  
97 environment in which neither monoculture exhibited motility. The emergent social spreading is  
98 shown in Fig. 1.

99 Social spreading becomes apparent between 24 and 48 h after inoculation, when the  
100 colony begins to spread from the edge of the inoculum (Fig. 1b 48 h). The diameter of the  
101 spreading co-culture is significantly different from the colony expansion of the mono-cultures  
102 starting at the 24 h time point ( $p < 0.001$ ) (Fig. 1a). Once the spreading phenotype is fully visible  
103 (around 72 h), the average speed of expansion is  $1.69 \mu\text{m}/\text{min} \pm 0.09$  (SEM). At the onset of  
104 movement, the leading edge has a visibly thicker front (Fig. 1b 48 h). As the colony spreads, the  
105 thick front disappears and small 'veins' radiating from the center develop. Over time, the 'veins'  
106 become more pronounced towards the leading edge, making a 'petal' pattern (Figs. 2a, b). The  
107 leading edge is characterized by a distinctive, terraced appearance comprised of three to six  
108 layers (Fig. 2c). Varying the initial ratios between 5:1 and 1:5 *Pseudomonas:Pedobacter* did not  
109 have a visible effect on spreading across the plate (data not shown).

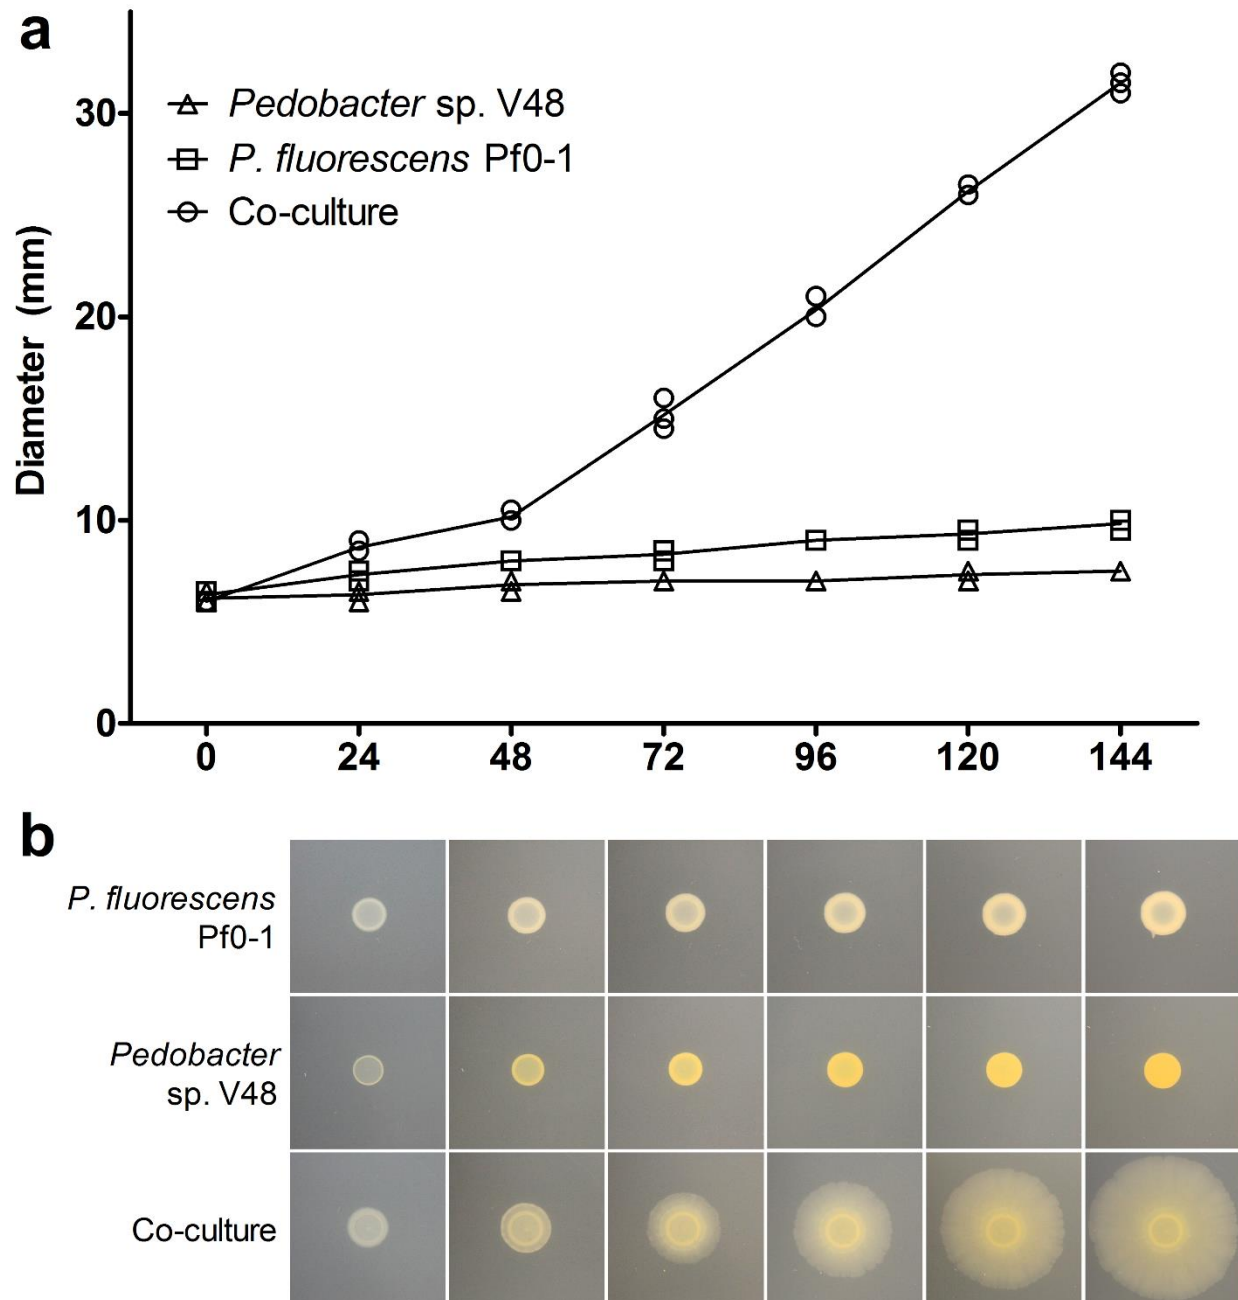

**Figure 1.** Mixed colony of *P. fluorescens* Pf0-1 and *Pedobacter* sp. V48 spreads across a hard surface (2% agar), a behavior not observed in the mono-culture of either species. a) Diameter of colonies at 24 h intervals for three independent experiments. b) Phenotypes of mono- and co-cultures at 24 h intervals. Contrast and brightness levels were adjusted for optimal viewing.



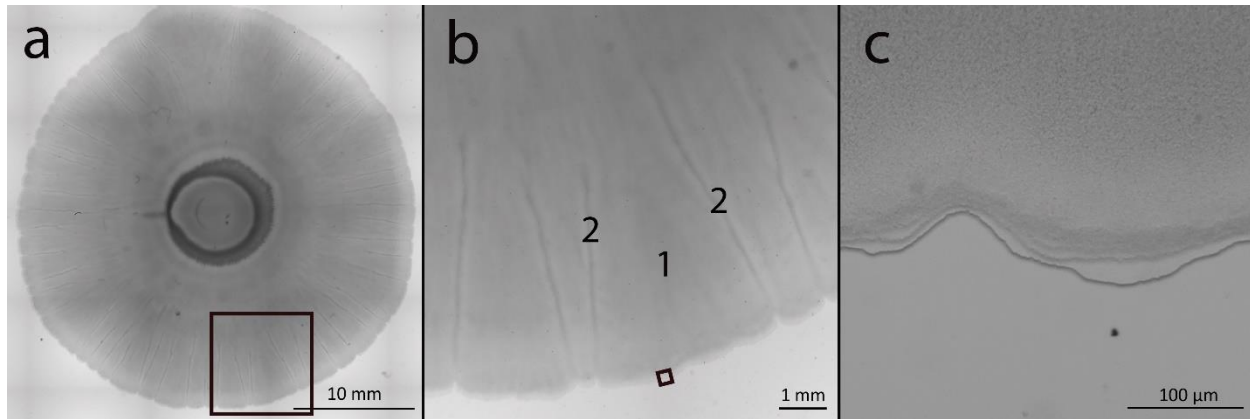

**Figure 2.** Mixed colony of *P. fluorescens* Pf0-1 and *Pedobacter* sp. V48 at different magnifications. a) Image of the whole co-culture colony created by stitching an 8X magnification mosaic. b) 16X magnification of the leading edge showing the patterns of ‘petals’ (1) in between ‘veins’ (2) visible near the edge of the colony c) 112X magnification shows a terraced appearance of the leading edge. Colony imaged 144 h after inoculation. Black boxes indicate area enlarged in the adjacent panel. Scale bars are noted at the bottom of each image. Contrast and brightness levels were adjusted for optimal viewing.

## 110 ***P. fluorescens* Pf0-1 and *Pedobacter* sp. V48 co-migrate**

111 The previously observed ‘bacterial expansion’ of *Pedobacter* when interacting with  
112 *Pseudomonas* sp. AD21 was suggested to be gliding motility, triggered as a mechanism to  
113 escape competition from *P. fluorescens* (5, 9). We examined the possibility that the spreading  
114 observed when co-inoculating *Pedobacter* and *P. fluorescens* Pf0-1 was a result of *Pedobacter*  
115 moving away from *P. fluorescens*. Bacteria were collected from the center, middle, and edge of  
116 a seven-day-old motile colony. The presence or absence of each species was tested by  
117 culturing these samples on selective media. We recovered both species from each point in the  
118 spreading colony (data not shown), showing co-migration rather than an escape strategy by  
119 *Pedobacter*.

## 120 **Interspecies social spreading shows reproducible spatial organization**

121 To obtain a more detailed look at the spatial relationships within the spreading colony,  
122 we tagged *P. fluorescens* with a cyan fluorescent protein (eCFP (21)) and *Pedobacter* with a red  
123 fluorescent protein (dsRedEXPRESS (21)), integrated into the chromosome. In *P. fluorescens*,

124 eCFP carried by a miniTn7 transposon was integrated upstream of *glmS* (22), creating Pf0-*ecfp*.  
125 In *Pedobacter*, dsRedEXPRESSION carried by the *HimarEm* transposon (23) was integrated at  
126 random locations in the chromosome, resulting in 16 independently-derived mutants with an  
127 insert. Each tagged *Pedobacter* strain (V48-*dsRed*) was indistinguishable from the wild-type in  
128 social assays with *P. fluorescens*, indicating no deleterious impact of the insertions. We picked  
129 one strain with an insert in locus N824\_RS25465 (GenBank accession NZ\_AWRU01000034),  
130 and no apparent defect in social spreading. The initiation of social spreading appeared slightly  
131 delayed in a mixture of the tagged strains, but the visible patterns and stages of development  
132 looked identical, and speed was not significantly different once spreading initiated.

133         Fluorescent microscopy verified culturing data that showed both bacteria are present  
134 throughout the spreading colony, but we also found that population density varies across distinct  
135 areas within the colony. These distribution patterns were highly reproducible and show six  
136 distinct zones (Fig. 3). At zone 1, the point of inoculation, fluorescent imaging shows a  
137 homogenous mix of both bacteria (Fig. 3b, c). Zone 2, the coffee ring effect formed at the edge  
138 of the point of inoculation (24–26), is bright orange, indicating that *Pedobacter* dominates this  
139 region (Fig. 3b). *Pedobacter* spreads out from this dense area into zone 3, in a starburst pattern  
140 (Fig. 3b). Just outward from the starburst, we see a blue ring (zone 4), where *P. fluorescens*  
141 appears more abundant (Figs. 3c, d). In the main body of the co-culture, a thin motile section  
142 spreads out, making ‘petals’ (Zone 5), with ‘veins’ (Zone 6) between them (Figs. 2b and 3a).  
143 The ‘veins’ between the ‘petals’ appear to have high *Pedobacter* populations (Fig. 3b), while the  
144 areas directly surrounding them are dominated by *P. fluorescens* (Fig. 3c). The flat areas of the  
145 ‘petals’ appear more well-mixed, though the red signal becomes difficult to detect toward the  
146 edge of the colony (Fig. 3d). Overall, imaging data show that we can find both species  
147 throughout the colony, but the distribution is not homogenous. Rather, we observed  
148 reproducible patterns with some well-mixed areas and others of high spatial assortment.

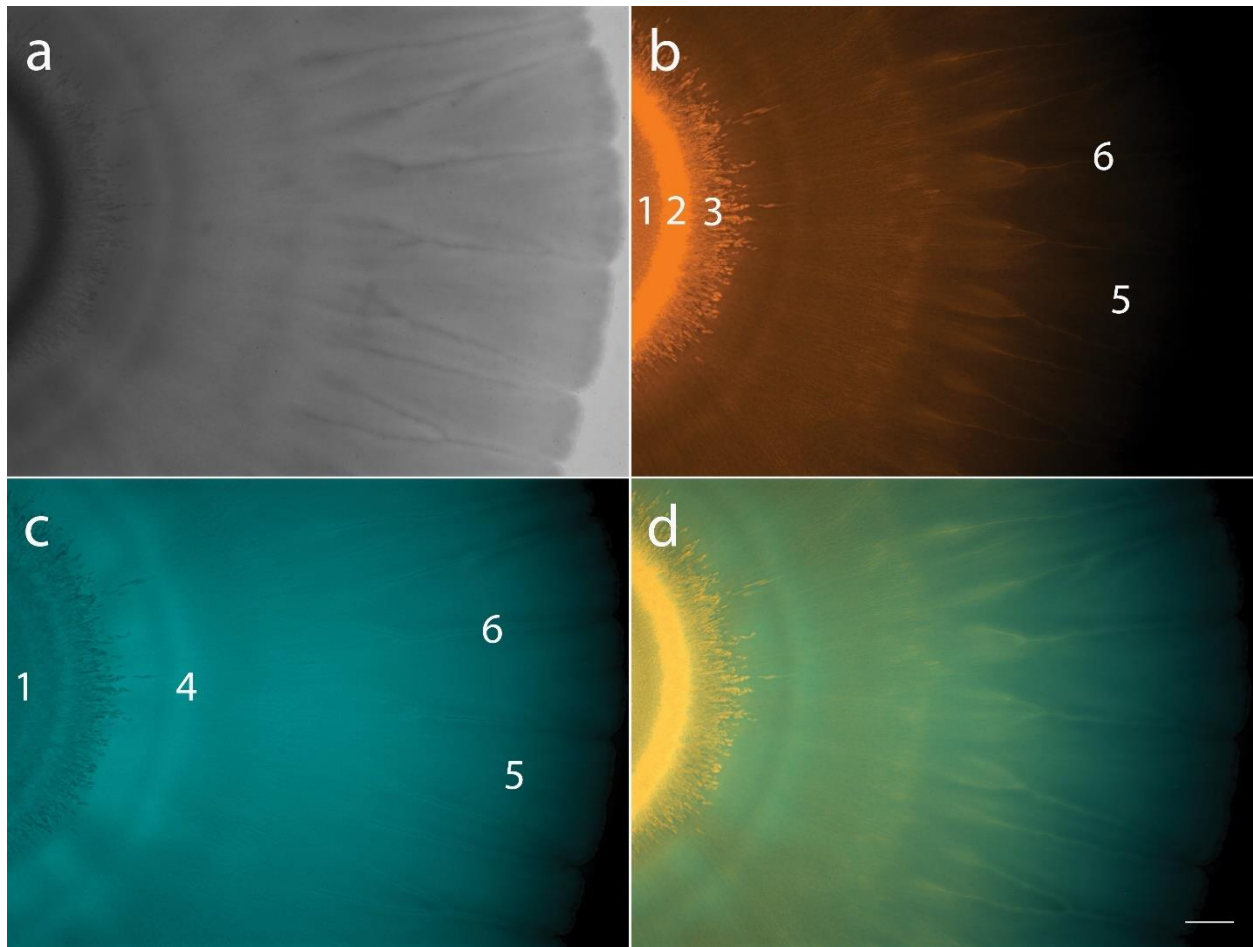

**Figure 3.** Mixed colony of fluorescently-tagged *P. fluorescens* Pf0-1 (Pf0-ecfp) and *Pedobacter* sp. V48 (V48-dsRed). a) Co-culture colony viewed with white light. b) Co-culture imaged using DsRed filter (filter set 43 HE), pseudo-colored in orange, showing V48-dsRed distribution throughout the colony. c) Co-culture imaged using CFP filter (filter set 47 HE), pseudo-colored in turquoise, showing Pf0-ecfp distribution throughout the colony. d) Merged images of DsRed and CFP filters. Numbers on panels b and c indicate six zones of distinct patterns: 1. Point of inoculation, 2. Coffee ring, 3. Starburst, 4. *P. fluorescens* ring, 5. Petals, 6. Veins. Colonies imaged at 7X magnification, scale bar represents 1 mm. Colony imaged 144 h after inoculation.

### 149 **Diffused compounds and heat-killed cells do not trigger interspecies social spreading**

150 Previous studies demonstrated that interactions between *P. fluorescens* and *Pedobacter*  
151 were mediated via both diffusible and volatile signals (6–8). We first asked whether spreading  
152 could be triggered by diffusible compounds produced by one of the partner species or by the co-  
153 culture. Mono and co-cultures grown on cellophane membranes were used to pre-condition our  
154 spreading assay agar. After two days, cellophane membranes (and the bacteria growing on

155 them) were peeled off the agar. Plates were then inoculated with one of the partner strains to  
156 evaluate development of the social spreading phenotype. After seven days of growth, no sign of  
157 spreading beyond normal colony expansion was observed (change in diameter was not  
158 significantly different from negative control), indicating that no motility-inducing compounds had  
159 been secreted into the agar.

160 As the signal did not appear to diffuse through cellulose, we next asked if inactive cells  
161 or cell fragments of each species could trigger spreading in the other species. To address this,  
162 we used dead cells from one species, or from the spreading co-culture. Mono- and co-cultures  
163 were grown on TSB-NK media (as previously described) for 4 days, suspended in phosphate  
164 buffer, and heat-killed at 65 °C for 15 minutes. This heat-killed suspension was added directly  
165 on top of growing colonies of each species, or to wells adjacent to the colony being tested.  
166 Heat-killed suspension was added every 24 hours for five days. The plates were monitored for  
167 ten days, but no social spreading was observed under any condition, beyond that due to  
168 physical disruption which is also present in the buffer control.

### 169 **Physical association of *P. fluorescens* Pf0-1 and *Pedobacter* V48 is required for** 170 **interspecies social spreading**

171 Because a diffusible signal was unlikely to be triggering social spreading, we asked  
172 whether a close association between the two bacteria was a necessary condition for the  
173 interaction. To answer this question, we used assays in which the bacterial participants were  
174 plated side-by side with no physical barrier and in which they were separated only by semi-  
175 permeable membranes.

176 When colonies were adjacent, rather than mixed, no social spreading was observed  
177 while the *P. fluorescens* and *Pedobacter* colonies were visibly separate (data not shown).  
178 However, once the colonies grew sufficiently to make contact (Fig. 4 24 h), the colony started to

179 spread out from the point of contact (72 h). The spreading front radiates outward (96 h), first  
180 developing around the *P. fluorescens* colony (144 h), then proceeding to surround the  
181 *Pedobacter* colony (192 h). At this level of resolution, contact between the colonies appears to  
182 occur before any social spreading can be seen.

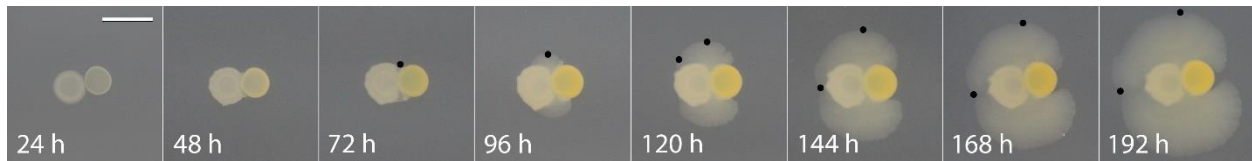

**Figure 4.** Social spreading emerges after contact between colonies of *P. fluorescens* Pf0-1 and *Pedobacter* sp. V48, left and right in each panel, respectively. Colonies come into contact 24 hours after inoculation; the motile front becomes visible 48 hours after contact and spreads outward and around the *P. fluorescens* colony before surrounding the *Pedobacter* colony. Black spots indicate sampling locations. Pictures taken every 24 h. Scale bar represents 10 mm.

183 Samples were collected from the edge of the moving front every 24 hours after contact,  
184 both on a y-axis from the point of contact and following the moving front as it wrapped around  
185 the *P. fluorescens* colony (Fig. 4). The presence of each species was tested by culturing these  
186 samples on selective media. Both species were culturable at every point sampled (data not  
187 shown), showing that *Pedobacter* is present in the moving front behind the *P. fluorescens*  
188 colony (Fig. 4, 144 h), on the opposite side of where they initially came into contact. This  
189 indicates that *Pedobacter* moves around the *P. fluorescens* colony on the motile front.

190 To further evaluate the requirement that *P. fluorescens* and *Pedobacter* be physically  
191 associated, we inoculated both strains immediately adjacent to each other but separated by  
192 either semi-permeable mixed-ester cellulose or PES (polyethersulfone) membranes. When  
193 inoculated this way, individual colony growth continued as normal, but these bacteria were  
194 unable to trigger social spreading despite their close proximity. After six days of growth, no sign  
195 of interspecies social spreading was observed (Fig. 5).

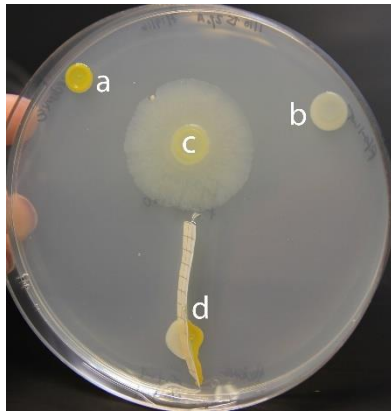

**Figure 5.** A semi-permeable barrier prevents development of the interspecies social spreading phenotype. a) *Pedobacter* sp. V48 monoculture, b) *P. fluorescens* Pf0-1 monoculture, c) a mixed colony, and d) *P. fluorescens* and *Pedobacter* separated by a mixed-ester cellulose membrane. Pictures taken 144 h after inoculation. Colonies were grown on a 100 mm petri dish.

## 198 **Nutritional environment influences interspecies social spreading**

199 Conditions in soil and rhizosphere environments fluctuate, with bacteria subjected to a  
200 wide range of environmental stressors, including limited nutrient and water availability (2).  
201 Because such fluctuations may influence expression of traits, we examined the effect of nutrient  
202 level on interspecies social spreading. Our standard assay condition, TSB-NK, consists of 10%  
203 strength Tryptic Soy (3 g/L) supplemented with NaCl (5 g/L) and  $\text{KH}_2\text{PO}_4$  (1 g/L).

204 We first asked if interspecies social spreading could initiate under richer nutrient  
205 conditions. No social spreading was apparent when *P. fluorescens* and *Pedobacter* were mixed  
206 on full-strength TSB (30 g/L) (Fig. 6a), with the co-culture exhibiting the same characteristics  
207 and colony expansion as the *P. fluorescens* mono-culture. We next asked whether the salt  
208 amendments to TSB-NK influence interspecies social spreading, using assays without the  
209 addition of salts, and with the addition of NaCl and  $\text{KH}_2\text{PO}_4$  individually. When grown on 10%  
210 TSB, the co-culture is motile, but the distance spread is modest compared to when the medium  
211 is supplemented with both salts (Fig. 6c). The individual *P. fluorescens* colony expands similarly  
212 to the co-culture, suggesting minimal social behavior under these conditions. Growth on TSB-K  
213 changes neither pattern nor rate of mono- and co-culture expansion compared to 10% TSB  
214 (data not shown). On TSB-N, the mixed culture spreads and develops the patterns  
215 characteristic of interspecies social spreading, while the *P. fluorescens* mono-culture does not

216 expand (Fig. 6d). The phenotype and diameter of the spreading colony are most similar to those  
217 observed in TSB-NK conditions (Fig. 6b).

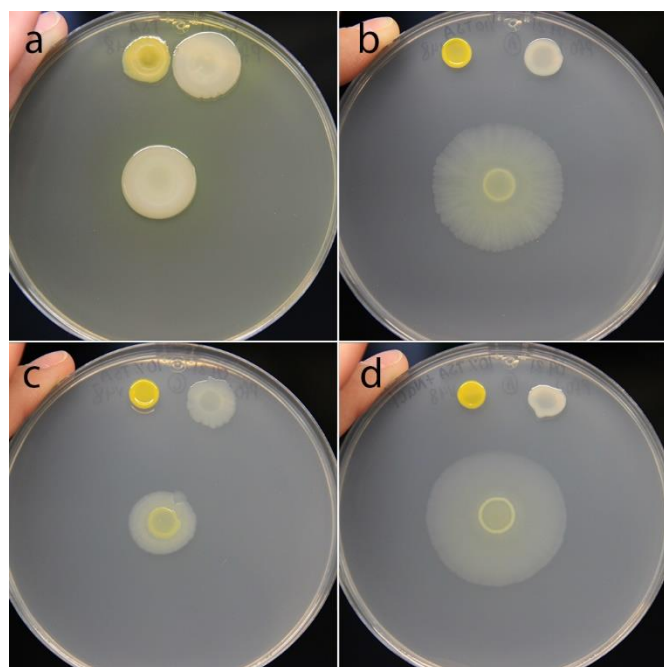

**Figure 6.** Low nutrient and high salt conditions are required for interspecies social spreading. a) Mixed colony on full-strength TSB does not show social spreading. b) Mixed colony on TSB-NK (10% Tryptic Soy supplemented with both NaCl and  $\text{KH}_2\text{PO}_4$ ) shows social spreading. c) Mixed colony on 10% strength TSB shows impaired social spreading. d) Mixed colony on TSB-N (supplemented with NaCl) exhibits the interspecies social spreading phenotype. For all panels *Pedobacter* sp. V48 mono-culture is on the top left of the plate, *P. fluorescens* Pf0-1 is on the top right of the plate, and the mixed colony is in the center. Pictures were taken 144 h after inoculation. Colonies were grown on a 100 mm petri dish.

219 In the previous experiment, we observed that variations of Tryptic Soy media led to  
220 altered social phenotypes. To assess the influence of each component of TSB on interspecies  
221 social spreading, we utilized a medium in which these were individually manipulated. We made  
222 eight combinations of media to vary D-glucose, tryptone, and NaCl in concentrations equivalent  
223 to those in full-strength and 10% TSB. On media with D-glucose or tryptone at full-strength  
224 concentrations, we did not observe social spreading regardless of the concentration of the other  
225 components (Figs. 7a-f). In these conditions, the appearance and expansion of the co-culture  
226 resembled that of the *P. fluorescens* mono-culture, with notably greater biomass in media with  
227 full-strength tryptone (Figs. 7a-d). When the concentration of all three components was reduced  
228 to 10% we observed social spreading, but the migration distance of the co-culture was modest,  
229 and *P. fluorescens* mono-culture expanded to a similar extent (Fig. 7h). On media containing  
230 10% strength D-glucose, 10% strength tryptone, and full-strength NaCl, interspecies social

231 spreading emerged when *P. fluorescens* and *Pedobacter* were co-cultured (Fig. 7g). Unique to  
232 this condition, the mono-cultures of both strains are immotile, indicating a dramatic change in  
233 behavior when strains are mixed. The observations under this condition are most similar to  
234 those observed on TSB-N and TSB-NK (Figs. 6b, d).

235         Based on these results, we conclude that full interspecies social spreading was only  
236 observed in low nutrient medium supplemented with NaCl (Figs. 6b, d, and 7g). We observed  
237 reduced social spreading on low nutrient media without salt supplementation (Figs. 6c and 7h),  
238 and an absence of social behavior on rich media (Figs. 6a and 7a-f). While we can implicate salt  
239 as an important factor in social spreading, high salt concentrations alone are not sufficient to  
240 induce social behavior, as we do not see social behavior under rich media conditions. This  
241 indicates that there may be more than one important nutritional component factored in the  
242 decision of these bacteria to socialize.



| Glucose | Tryptone | NaCl | Phenotype                                                                           |
|---------|----------|------|-------------------------------------------------------------------------------------|
| a       | High     | High | 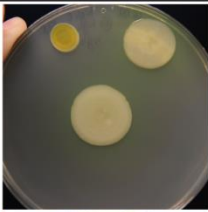   |
| b       | High     | Low  |    |
| c       | Low      | High |    |
| d       | Low      | Low  |   |
| e       | High     | High |  |
| f       | High     | Low  |  |
| g       | Low      | High |  |
| h       | Low      | Low  |  |

**Figure 7.** Effect of nutrient levels in interaction between *P. fluorescens* Pf0-1 and *Pedobacter* sp. V48, looking at 3 core components of TSB: tryptone (20 g/L), D-glucose (2.5 g/L), and NaCl (5 g/L) for 'high' concentrations. Components were reduced to 1/10 for 'low' concentrations. For all panels *Pedobacter* mono-culture is on the top left of the plate, *P. fluorescens* is on the top right of the plate, and the mixed colony is in the center. Pictures were taken 144 h after inoculation. Colonies were grown on 100 mm petri dishes.

## 255 **Discussion**

256           In this study we investigate interspecies social spreading, a phenomenon that emerges  
257 from the interaction of two distantly-related soil bacteria. Neither species moves on its own  
258 under the conditions of our study, but a mixture of the two species can spread across a hard  
259 surface (2% agar). Contact between the two bacterial colonies is required for spreading to  
260 initiate, and this association is maintained as the co-culture expands. The social phenotype  
261 could be observed only under specific nutritional conditions, indicating an interplay between  
262 environmental and biological factors. The interaction between *Pedobacter* and *P. fluorescens*  
263 serves as a simple and tractable model for investigating interspecies interactions. Our research  
264 contributes to the growing body of work studying bacteria in social contexts to investigate  
265 emergent traits and behaviors.

266           Surface motility is a trait that could be beneficial to bacteria under a range of  
267 environmental conditions. Species related to *Pedobacter* sp. V48 use gliding motility on 1% agar  
268 or glass surfaces (27–29). V48 has not been observed to engage in gliding motility, but we have  
269 observed phenotypes similar to sliding motility in other species (30, 31), when inoculated on  
270 semi-solid agar (unpublished observations). *P. fluorescens* Pf0-1 is capable of flagella-driven  
271 swimming in and swarming motility on semi-solid agar (0.3% and 0.6% respectively) without the  
272 need for a partner bacterium (32, 33). Interspecies social spreading is distinct from  
273 *Pseudomonas* flagellar motility in its requirement of the presence of a second species.  
274 Additionally, media with higher agar percentages form environments that are non-permissive for  
275 flagella-driven motility in *P. fluorescens*, as well as most species, but together, Pf0-1 and V48  
276 appear to employ an alternative strategy for movement across hard surfaces.

277           De Boer *et al.* (5) suggested that in water agar, the sporadic occurrence of movement  
278 they observed indicated a strategy by *Pedobacter* to escape competition. However, the co-

279 migration under our conditions does not support this hypothesis, as the two species remain  
280 associated throughout the colony. Our contact experiments provide further evidence, as the  
281 presence of *Pedobacter* in the motile areas surrounding the *P. fluorescens* colony shows it has  
282 moved towards its partner, rather than away from it. The pattern of *Pedobacter* migration clearly  
283 indicates that it is not escaping.

284 Evidence, both from culturing and fluorescent imaging, shows that *P. fluorescens* and  
285 *Pedobacter* co-migrate across the hard agar surface. Initiation of the process requires physical  
286 contact, as motility is precluded when a semi-permeable membrane is placed between the two  
287 colonies. We suggest that the nature of this interaction is distinct from contact-dependent toxin  
288 delivery systems, such as type VI secretion and contact-dependent growth inhibition, as they  
289 commonly mediate signal exchange between closely-related species, and are involved in  
290 competition between more distantly-related strains (34–36). While our results do not rule out  
291 quorum sensing for communication between the two species (37), a diffusible signal (if it exists)  
292 does not appear to be sufficient to trigger the motility response. Additionally, our experiment in  
293 which bacteria are pre-grown on cellophane indicates that social spreading is not triggered by a  
294 change in the medium caused by metabolic activity of one of the two species. Our data indicate  
295 that physical association is required for social spreading between *P. fluorescens* and  
296 *Pedobacter*. The question remains, are the bacteria producing a signal which induces an  
297 already-present motility mechanism in one species, or are they directly manipulating the  
298 environment in a way which facilitates co-migration, such as by production of a surfactant?  
299 Regardless of which mechanism is used, close association is still a prerequisite for either  
300 induction or facilitation of social spreading.

301 Bacteria dwelling in soil experience variations in a wide range of abiotic conditions,  
302 including the key parameters we have tested: salinity and available carbon and nitrogen (2).  
303 Environmental conditions have previously been shown to affect motility of individual species;

304 gliding motility in some *Flavobacterium* species increases with reduced nutrient concentration  
305 (38, 39). Changes in behavior resulting from environmental fluctuations can affect how species  
306 interact with one another. The ability of *P. fluorescens* and *Pedobacter* to spread socially is  
307 dependent upon the conditions in which they are growing. In general, high concentrations of  
308 glucose and amino acids lead to a build-up of biomass and no apparent social movement.  
309 Lower glucose and amino acid concentrations are associated with interspecies social spreading  
310 across the plate, but decreasing the salt concentration of the media slows expansion of the  
311 colony. Social spreading resulting from the interaction is conditional, with alteration of just a  
312 subset of environmental factors resulting in dramatic changes in behavior. It is tempting to  
313 speculate that the consortium of *P. fluorescens* and *Pedobacter* can integrate signals from each  
314 other's presence and from the nutrient conditions of their environment to determine whether to  
315 behave socially. We see similar examples of intraspecies social behaviors being influenced both  
316 by biotic factors (quorum sensing) and by abiotic factors (nutrient conditions) in *P. aeruginosa*  
317 (40), *Bacillus subtilis* (41), and yeast (42).

318         There are a wide variety of examples of motility resulting from interspecies interactions,  
319 where the presence of a motile partner fosters the motility of an immotile participant. Non-motile  
320 *Staphylococcus aureus* hitchhikes on swimming *P. aeruginosa* (43) and *Burkholderia cepacia*  
321 co-swarms with *P. aeruginosa* in environments where it cannot do so independently (19). *X.*  
322 *perforans* induces motile *P. vortex* to swarm towards it, which allows it to hitchhike on top of *P.*  
323 *vortex* rafts (20). *P. vortex* is also capable of carrying fungal spores or antibiotic-degrading  
324 cargo bacteria to cross unfavorable environments (18, 44). In an even more complex system,  
325 *Dyella japonica* can migrate on fungal hyphae, but some strains can only do so in the presence  
326 of a *Burkholderia terrae* helper (45, 46). All of these examples of 'hitchhiking' phenomena  
327 require one species to already be motile, and stand in contrast to the behavior we have  
328 investigated, where social spreading emerges from two conditionally non-motile participants.

329 The fact that both species are present at the edge of the spreading colony suggests that both  
330 have an active role in the behavior, though it doesn't rule out the possibility of one species  
331 inducing motility in the other and hitchhiking, as seen in other systems (20).

332 In addition to describing a new mode of motility, this discovery highlights the possibility  
333 that many functions and behaviors of bacteria in complex communities may be triggered by  
334 interactions between different species or even domains. Studying interactions between two or  
335 more microorganisms may lead to the discovery of emergent traits that would be impossible to  
336 predict based on the study of each organism in isolation. Alongside approaches that  
337 characterize the members and connectedness of microbial communities, tools to decipher the  
338 phenotypic outcomes of interactions are needed in order to develop a full appreciation of  
339 microbiomes. Studies of this type are important for understanding the role of microbial  
340 communities within an ecological context.

341 We have investigated an interaction-dependent trait which emerges under particular  
342 nutritional conditions when distantly-related bacteria come into close physical contact. This  
343 interaction gives the participating bacteria the ability to spread on a hard agar surface, which  
344 neither can do alone. This strategy of co-migration may serve as an additional mechanism by  
345 which plant- and soil-associated bacteria can move in their natural environments, when the  
346 conditions do not favor the modes of single-species motility previously described. Given the  
347 distant and different locations from which these two strains were isolated, we hypothesize this is  
348 not a unique interaction between this pair, but rather has evolved between various *Pedobacter*  
349 and *Pseudomonas* species. To understand the phenomenon, several lines of investigation  
350 should be pursued: mechanistic studies which explore the factors each species is contributing to  
351 social spreading, the process by which contact triggers motility, whether there are important  
352 metabolic interactions, and the way in which environmental conditions are integrated into the  
353 decision to move together. The system we study is a tractable model for studying interspecies

354 interactions, giving us the opportunity to answer questions about the nature of interspecies  
355 social spreading and ask questions about the broader field of bacterial communities. Models  
356 such as these will ultimately lead to a greater understanding of the functions of communities as  
357 a whole rather than as collections of individuals.

## 358 **Materials and Methods**

359 **Bacterial strains, primers, plasmids, and culture conditions.** Bacterial strains and plasmids  
360 are described in Table 1. *E. coli* was grown at 37 °C in LB Broth, Miller (Fisher Scientific).  
361 *Pseudomonas fluorescens* Pf0-1 and *Pedobacter* sp. V48 were routinely grown at 30°C or 20°C  
362 respectively, in 10% strength Tryptic Soy Broth (BD Difco™) amended with NaCl and KH<sub>2</sub>PO<sub>4</sub>,  
363 as described by de Boer (5). This medium is referred to throughout the text as TSB-NK. To  
364 differentiate the two species from mixed cultures we used *Pseudomonas* minimal medium  
365 (PMM) with 25 mM succinate (47) for *P. fluorescens* and 14.6 mM lactose for *Pedobacter*.  
366 Media were solidified with BD Difco™ Bacto™ agar (1.5% w/v) when required, except for social  
367 spreading assays, for which 2% agar was used. For experiments with variations in nutrients, we  
368 used full-strength TSB (30 g/L), 10% TSB (3 g/L), and 10% TSB amended with NaCl or KH<sub>2</sub>PO<sub>4</sub>  
369 (called TSB-N or TSB-K, respectively), and a medium composed of D-glucose (2.5 g/L),  
370 tryptone (20 g/L), and NaCl (5 g/L). These individual components were used at those  
371 concentrations or reduced to 10% concentration in all eight combinations. For selection of  
372 transposon insertions carrying fluorescent protein genes, Kanamycin (50 µg/mL), Gentamicin  
373 (50 µg/mL), or Erythromycin (100 µg/mL) was added to the growth medium.

374 **Interspecies social spreading assays.** *P. fluorescens* and *Pedobacter* for use in social  
375 spreading assays were incubated in 2 mL TSB-NK at 20 °C for 24 hours, with shaking (160  
376 rpm). Social spreading assays were carried out on TSB-NK solidified with 2% agar. Plates were  
377 poured at a temperature of ~62 °C in a single layer and allowed to set for ~15 minutes before  
378 inoculation. Inoculation was done on freshly-poured plates.

379 (i) Mixed inoculum assays. Assays were started by combining 5 µL of each participant in one  
380 spot on the agar surface. As controls, 10 µL spots of each bacterial isolate were plated distant  
381 from each other and the co-culture, all on the same plate. Once the inoculation liquid had dried,

382 plates were incubated at 20 °C. Measurements of the colony diameter were taken every 24  
383 hours. Experiments were performed in triplicate.

384 (ii) Direct contact assay - adjacent plating. *P. fluorescens* and *Pedobacter* were grown as  
385 described above. The aliquots of bacteria were plated adjacent but without the drops touching.  
386 Once the inoculation liquid had dried, plates were incubated at 20 °C and monitored daily to  
387 determine the time at which colony growth led to contact between the isolates, and when  
388 spreading phenotypes developed.

389 (iii) Direct contact assay - separation by membranes. *P. fluorescens* and *Pedobacter* were  
390 plated close together, separated only by a membrane. Either Millipore Polyethersulfone (PES)  
391 Express Plus® Membrane (0.22 µm pores) or Gelman Sciences mixed-ester cellulose Metricel  
392 Membrane (0.45 µm pores) were cut into rectangular strips and sterilized by autoclaving. These  
393 strips were then embedded into the agar by suspending them perpendicular to the bottom of  
394 petri dishes with forceps, as agar was poured into plates. Once set, the filters protruded  
395 approximately 5 mm above the agar surface. Bacteria were inoculated on either side of the filter,  
396 with 5 µL spots of each species, close enough to touch the filter.

397 (iv) Cellophane overlay assay. Squares of porous cellophane (GE Healthcare Bio-sciences  
398 Corp) were placed on top of TSB-NK plates. Cultures of *P. fluorescens*, *Pedobacter*, and a co-  
399 culture of the two, were placed on top of the cellophane, with cellophane alone used as a  
400 negative control. Plates were incubated at 20 °C for two days, at which point cellophane was  
401 removed, and 5 µL spots of either species were placed in the center of the plate, so that  
402 cultures were on a plate where cellophane had been (negative control), one where the partner  
403 species had been cultured, or one where a mix of the species had been cultured.

404 (v) Heat-kill assay. Cells were scraped from TSB-NK plates, suspended in PBS buffer, heat-  
405 killed, and added on top of or adjacent to a colony of *Pseudomonas* or *Pedobacter* to test the



406 ability of heat-killed cells to induce movement in the partner species. To place the heat-killed  
407 suspension adjacent to living colonies, a well was made in freshly-poured agar, by cutting a  
408 core using the top end of a 10  $\mu$ L pipette tip (USA Scientific, Inc.), and partially filling it in using  
409 60-70  $\mu$ L agar. Cultures of *Pseudomonas* or *Pedobacter* (5  $\mu$ L spots) were inoculated adjacent  
410 to the well, and the well was filled with the heat-killed suspension. For experiments in which the  
411 heat-killed suspension was added directly on top of living colonies, these colonies were initiated  
412 with 10  $\mu$ L spots of liquid culture. The suspensions added directly on top of the colony or to the  
413 wells were heat-killed *Pseudomonas* or co-culture on/next to a *Pedobacter* colony, or heat-killed  
414 *Pedobacter* or co-culture on/next to a *Pseudomonas* colony. These heat-killed cells, or PBS  
415 buffer as a negative control, were added to the colonies or wells every 24 hours until the end of  
416 the experiment. The cells added on top of the colonies or into the wells were extracted from 4-  
417 day-old mono- and co-culture colonies on TSB-NK, inoculated and cultured as previously  
418 described. Whole colonies from these plates were resuspended in 1 mL PBS buffer, vortexed  
419 until fully suspended, then heat-killed at 65 °C for 15 minutes. Effectiveness of heat-killing was  
420 evaluated by plating 100  $\mu$ L of resuspension on TSB-NK, and PMM with succinate or lactose.

#### 421 **Fluorescent protein tagging**

422 (i) eCFP labeling of *P. fluorescens*. pUC18T-mini-Tn7T-Gm-ecfp was a gift from Herbert  
423 Schweizer (Addgene plasmid # 65030). A constitutively-expressed fluorescent protein gene  
424 carried by pUC18T-mini-Tn7T-Gm-ecfp was transferred to *P. fluorescens* by conjugation from *E.*  
425 *coli* S17-1, with transposase being provided by pUX-BF13 introduced from a second *E. coli*  
426 S17-1 donor, as previously described (48). Transposon-carrying strains were selected by  
427 growth on Gentamicin (50  $\mu$ g/mL), and transposition of the miniTn7 element into the target site  
428 in the *P. fluorescens* genome was confirmed by PCR using primers Tn7-F and *gImS*-R (Table  
429 2). Pf0-1 with fluorescent inserts were tested for alteration in interspecies social spreading by  
430 co-culturing with *Pedobacter*, as described above.

431 (ii) dsRedEXPRESS labeling of *Pedobacter*. pUC18T-mini-Tn7T-Gm-*dsRedExpress* was a gift  
432 from Herbert Schweizer (Addgene plasmid #65032). To express *dsRedEXPRESS* in  
433 *Pedobacter*, a *Pedobacter* promoter was cloned upstream of the *dsRedEXPRESS* coding  
434 sequence. A highly expressed gene from an unpublished RNAseq experiment was identified  
435 (N824\_RS25200) and the upstream 300 bp were amplified from *Pedobacter* genomic DNA  
436 using primers *PompA* and *dsRed*, designed for splicing-by-overlap extension-PCR (SOE-PCR)  
437 (Table 2). The promoter was then spliced with the amplified *dsRedEXPRESS* coding sequence  
438 using SOE-PCR (49). Flanking primers were designed with *KpnI* restriction sites, enabling  
439 cloning of the spliced product into a *KpnI* site in *pHimarEm1* (23). To join compatible ends  
440 between the plasmid and the amplicons, we used T4 DNA ligase (New England Biolabs, Inc.).  
441 The ligated plasmid was introduced into *E. coli* S17-1 competent cells by electroporation  
442 (BioRad Micropulser™). S17-1 colonies carrying the plasmid were selected by plating on LB  
443 medium containing Kanamycin (50 µg/mL), and the presence of the *dsRedEXPRESS* gene was  
444 confirmed by PCR, using *pHimar KpnI*-flank primers (Table 2). The resulting plasmid is called  
445 *pHimarEm1-dsRed*.

446 *pHimarEm1-dsRed* was transferred to *Pedobacter* by conjugation using a method adapted from  
447 Hunnicutt and McBride, 2000. Briefly, 20 hour old cultures of *E. coli* S17-1 (*pHimarEm1-dsRed*)  
448 and *Pedobacter* were subcultured 1:100 into fresh LB, and grown to mid-exponential phase (*E.*  
449 *coli*) or for 7 hours (*Pedobacter*). Cells were collected by centrifugation, suspended in 100 µL of  
450 LB, and then mixed in equal amounts on TSB-NK with 100 µL of 1M CaCl<sub>2</sub> spread on the  
451 surface. Following overnight incubation at 30 °C, cells were scraped off the surface of the plate,  
452 and dilutions were plated on TSB-NK with Erythromycin (100 µg/mL) to select for strains that  
453 received the plasmid (*ermF* is not expressed in *E. coli*). Transconjugants were incubated at 25  
454 °C for 3-4 days. Presence of the transposon insert in *Pedobacter* was confirmed using *ermF*

455 primers (Table 2). *Pedobacter* with fluorescent inserts were tested for alteration in interspecies  
456 social spreading by co-culturing with *Pseudomonas*, as described above.

457 The transposon insertion sites in the *Pedobacter* chromosome were amplified by arbitrarily-  
458 primed PCR (51), using a method adapted from O'Toole *et al.* (52) (see table 2 for primers), and  
459 identified by sequencing the arb-PCR products. Nucleic acid sequencing was performed by  
460 Massachusetts General Hospital CCIB DNA Core. Sequences were analyzed using CLC  
461 Genomics Workbench Version 10.1.1 (QIAGEN) to find location of transposon integration.

462 **Imaging.** Still pictures were taken using an EOS Rebel T3i camera (Canon) and processed  
463 using Photoshop CC 2017 Version: 14.2.1 and Illustrator CC 2017 Version: 17.1.0 (Adobe).  
464 Using Photoshop, the levels of some images were adjusted to improve contrast.

465 For microscopy, motile colonies were examined using an Axio Zoom.V16 microscope (Zeiss).  
466 To visualize fluorescent strains, filter set 43 HE DsRed was used with a 1.5 s exposure, shown  
467 with pseudo-color orange, as well as filter set 47 HE Cyan Fluorescent Protein, with a 600 ms  
468 exposure, shown with pseudo-color turquoise. Images were captured using Axiocam 503 mono  
469 camera, with a native resolution of 1936x1460 pixels. For image acquisition and processing we  
470 used Zen 2 Pro software (Zeiss).

471 **Statistics.** We measured the amount of colony expansion of the mono-cultures of both *P.*  
472 *fluorescens* and *Pedobacter* and the expansion of social spreading in co-culture. Colony  
473 diameter of three independent experiments was measured every 24 hours. To compare the  
474 diameter of mono-cultures and co-cultures at each time point, we performed a two-way ANOVA  
475 followed by a Bonferroni post-hoc test, using GraphPad Prism version 5.04 for Windows  
476 (Graphpad Software).

477 We compared the movement speed between a combination of wild type *P. fluorescens* and  
478 *Pedobacter* to a combination of fluorescently-tagged Pf0-ecfp and V48-dsRed. Colony diameter  
479 of six independent experiments were measured every day, and speed was calculated by  
480 dividing the distance traveled by the amount of time elapsed since the last time point. To  
481 calculate average speed, we only used time points after the interspecies social spreading  
482 phenotype developed. To compare the means of the speed of the wild-type and tagged strains,  
483 we conducted an unpaired, two-tailed, Student's t-test, using GraphPad Prism version 5.04.

484 **Acknowledgements**

485 This research received no specific grant from any funding agency in the public, commercial, or  
486 not-for-profit sectors. LMM was supported by a University of Massachusetts Dartmouth  
487 Distinguished Doctoral Fellowship.

488 The authors would like to thank Brianna Arruda, Michael Baym, Jacob Palmer, Emma Piatelli,  
489 and Marian Wahl for constructive criticism and expert advice.

490 **Author contribution statement**

491 LMM designed and carried out experiments, analyzed data, wrote the manuscript. ASB, SCS,  
492 and LMS each contributed a key experiment, and edited the manuscript. MWS contributed to  
493 experimental design, data analysis, writing and editing of the manuscript.

494 **Competing Interests**

495 The authors declare that they have no competing interests.

496 **References**

- 497 1. Philippot L, Raaijmakers JM, Lemanceau P, van der Putten WH. 2013. Going back to the  
498 roots: The microbial ecology of the rhizosphere. *Nat Rev Microbiol* 11:789–799.
- 499 2. Fierer N. 2017. Embracing the unknown: disentangling the complexities of the soil  
500 microbiome. *Nat Rev Microbiol* 15:579–590.
- 501 3. Abreu NA, Taga ME. 2016. Decoding molecular interactions in microbial communities.  
502 *FEMS Microbiol Rev* 40:648–663.
- 503 4. Blasche S, Kim Y, Oliveira AP, Patil KR. 2017. Model microbial communities for  
504 ecosystems biology. *Curr Opin Syst Biol* 6:51–57.
- 505 5. de Boer W, Wagenaar A-M, Klein Gunnewiek PJA, van Veen JA. 2007. *In vitro*  
506 suppression of fungi caused by combinations of apparently non-antagonistic soil bacteria.  
507 *FEMS Microbiol Ecol* 59:177–185.
- 508 6. Garbeva P, Silby MW, Raaijmakers JM, Levy SB, de Boer W. 2011. Transcriptional and  
509 antagonistic responses of *Pseudomonas fluorescens* Pf0-1 to phylogenetically different  
510 bacterial competitors. *ISME J* 5:973–985.
- 511 7. Garbeva P, Tyc O, Remus-Emsermann MNP, van der Wal A, Vos M, Silby M, de Boer W.  
512 2011. No apparent costs for facultative antibiotic production by the soil bacterium  
513 *Pseudomonas fluorescens* Pf0-1. *PLoS One* 6:e27266.
- 514 8. Garbeva P, Hordijk C, Gerards S, de Boer W. 2014. Volatile-mediated interactions  
515 between phylogenetically different soil bacteria. *Front Microbiol* 5:1–9.
- 516 9. Garbeva P, de Boer W. 2009. Inter-specific interactions between carbon-limited soil  
517 bacteria affect behavior and gene expression. *Microb Ecol* 58:36–46.
- 518 10. Seyedsayamdost MR, Traxler MF, Zheng S-L, Kolter R, Clardy J. 2011. Structure and

- 519 biosynthesis of amyachelin, an unusual mixed-ligand siderophore from *Amycolatopsis sp.*  
520 AA4. J Am Chem Soc 133:11434–11437.
- 521 11. Traxler MF, Seyedsayamdost MR, Clardy J, Kolter R. 2012. Interspecies modulation of  
522 bacterial development through iron competition and siderophore piracy. Mol Microbiol  
523 86:628–644.
- 524 12. Traxler MF, Watrous JD, Alexandrov T, Dorrestein PC, Kolter R. 2013. Interspecies  
525 interactions stimulate diversification of the *Streptomyces coelicolor* secreted metabolome.  
526 mBio 4:e00459-13.
- 527 13. Powers MJ, Sanabria-Valentin E, Bowers AA, Shank EA. 2015. Inhibition of cell  
528 differentiation in *Bacillus subtilis* by *Pseudomonas protegens*. J Bacteriol 197:2129–2138.
- 529 14. Grandchamp GM, Caro L, Shank EA. 2017. Pirated siderophores promote sporulation in  
530 *Bacillus subtilis*. Appl Environ Microbiol 83:e03293-16.
- 531 15. Jones SE, Ho L, Rees CA, Hill JE, Nodwell JR, Elliot MA. 2017. *Streptomyces* exploration  
532 is triggered by fungal interactions and volatile signals. Elife 6:e21738.
- 533 16. Stubbendieck RM, Straight PD. 2015. Escape from lethal bacterial competition through  
534 coupled activation of antibiotic resistance and a mobilized subpopulation. PLoS Genet  
535 11:e1005722.
- 536 17. Liu Y, Kyle S, Straight PD. 2018. Antibiotic stimulation of a *Bacillus subtilis* migratory  
537 response. mSphere 3:e00586-17.
- 538 18. Finkelshtein A, Roth D, Ben Jacob E, Ingham CJ. 2015. Bacterial swarms recruit cargo  
539 bacteria to pave the way in toxic environments. mBio 6:e00074-15.
- 540 19. Venturi V, Bertani I, Kerényi Á, Netotea S, Pongor S. 2010. Co-swarming and local  
541 collapse: quorum sensing conveys resilience to bacterial communities by localizing

- 542 cheater mutants in *Pseudomonas aeruginosa*. PLoS One 5:e9998.
- 543 20. Hagai E, Dvora R, Havkin-Blank T, Zelinger E, Porat Z, Schulz S, Helman Y. 2014.  
544 Surface-motility induction, attraction and hitchhiking between bacterial species promote  
545 dispersal on solid surfaces. ISME J 8:1147–1151.
- 546 21. Choi KH, Schweizer HP. 2006. mini-Tn7 insertion in bacteria with single attTn7 sites:  
547 Example *Pseudomonas aeruginosa*. Nat Protoc 1:153–161.
- 548 22. Lambertsen L, Sternberg C, Molin S. 2004. Mini-Tn7 transposons for site-specific tagging  
549 of bacteria with fluorescent proteins. Environ Microbiol 6:726–732.
- 550 23. Braun TF, Khubbar MK, Saffarini DA, McBride MJ, Ackerl JB. 2005. *Flavobacterium*  
551 *johnsoniae* gliding motility genes identified by *mariner* mutagenesis. J Bacteriol  
552 187:6943–6952.
- 553 24. Yanni D, Kalziqi A, Thomas J, Ng SL, Vivek S, Ratcliff WC, Hammer BK, Yunker PJ.  
554 2017. Life in the coffee-ring: how evaporation-driven density gradients dictate the  
555 outcome of inter-bacterial competition. arXiv <http://arxiv.org/abs/1707.03472>.
- 556 25. Sempels W, De Dier R, Mizuno H, Hofkens J, Vermant J. 2013. Auto-production of  
557 biosurfactants reverses the coffee ring effect in a bacterial system. Nat Commun 4:1757.
- 558 26. Deegan RD, Bakajin O, Dupont TF, Huber G, Nagel SR, Witten TA. 1997. Capillary flow  
559 as the cause of ring stains from dried liquid drops. Nature 389:827–829.
- 560 27. McBride MJ. 2001. Bacterial gliding motility: multiple mechanisms for cell movement over  
561 surfaces. Annu Rev Microbiol 55:49–75.
- 562 28. McBride MJ, Zhu Y. 2013. Gliding motility and por secretion system genes are  
563 widespread among members of the phylum *Bacteroidetes*. J Bacteriol 195:270–278.
- 564 29. McBride MJ. 2004. *Cytophaga-flavobacterium* gliding motility. J Mol Microbiol Biotechnol



- 565 7:63–71.
- 566 30. Martínez A, Torello S, Kolter R. 1999. Sliding motility in Mycobacteria. *J Bacteriol*  
567 181:7331–7338.
- 568 31. O’Rear J, Alberti L, Harshey RM. 1992. Mutations that impair swarming motility in  
569 *Serratia marcescens* 274 include but are not limited to those affecting chemotaxis or  
570 flagellar function. *J Bacteriol* 174:6125–6137.
- 571 32. Seaton SC, Silby MW, Levy SB. 2013. Pleiotropic effects of GacA on *Pseudomonas*  
572 *fluorescens* Pf0-1 in vitro and in soil. *Appl Environ Microbiol* 79:5405–5410.
- 573 33. Deflaun MF, Tanzer AS, Mcateer AL, Levy SB, Marshall B, Levy SB. 1990. Development  
574 of an adhesion assay and characterization of an adhesion-deficient mutant of  
575 *Pseudomonas fluorescens*. *Appl Environ Microbiol* 56:112–119.
- 576 34. Gallique M, Bouteiller M, Merieau A. 2017. The type VI secretion system: A dynamic  
577 system for bacterial communication? *Front Microbiol* 8:1–10.
- 578 35. Saak CC, Gibbs KA. 2016. The self-identity protein IdsD is communicated between cells  
579 in swarming *Proteus mirabilis* colonies. *J Bacteriol* 198:3278–3286.
- 580 36. Garcia EC. 2018. Contact-dependent interbacterial toxins deliver a message. *Curr Opin*  
581 *Microbiol* 42:40–46.
- 582 37. Juhas M, Eberl L, Tümmler B. 2005. Quorum sensing: The power of cooperation in the  
583 world of *Pseudomonas*. *Environ Microbiol* 7:459–471.
- 584 38. Laanto E, Bamford JKH, Laakso J, Sundberg LR. 2012. Phage-driven loss of virulence in  
585 a fish pathogenic bacterium. *PLoS One* 7:e53157.
- 586 39. Pérez-Pascual D, Menéndez A, Fernández L, Méndez J, Reimundo P, Navais R, Guijarro  
587 JA. 2009. Spreading versus biomass production by colonies of the fish pathogen

- 588 *Flavobacterium psychrophilum*: Role of the nutrient concentration. Int Microbiol 12:207–  
589 214.
- 590 40. Boyle KE, Monaco H, van Ditmarsch D, Deforet M, Xavier JB. 2015. Integration of  
591 metabolic and quorum sensing signals governing the decision to cooperate in a bacterial  
592 social trait. PLoS Comput Biol 11:1–26.
- 593 41. Lazazzera BA. 2000. Quorum sensing and starvation: signals for entry into stationary  
594 phase. Curr Opin Microbiol 3:177–182.
- 595 42. Chen H, Fink GR. 2006. Feedback control of morphogenesis in fungi by aromatic  
596 alcohols. Genes Dev 20:1150–1161.
- 597 43. Samad T, Billings N, Birjiniuk A, Crouzier T, Doyle PS, Ribbeck K. 2017. Swimming  
598 bacteria promote dispersal of non-motile staphylococcal species. ISME J 11:1933–1937.
- 599 44. Ingham CJ, Kalisman O, Finkelshtein A, Ben-Jacob E. 2011. Mutually facilitated dispersal  
600 between the nonmotile fungus *Aspergillus fumigatus* and the swarming bacterium  
601 *Paenibacillus vortex*. Proc Natl Acad Sci 108:19731–19736.
- 602 45. Warmink JA, Nazir R, Corten B, van Elsas JD. 2011. Hitchhikers on the fungal highway:  
603 The helper effect for bacterial migration via fungal hyphae. Soil Biol Biochem 43:760–  
604 765.
- 605 46. Warmink JA, van Elsas JD. 2009. Migratory response of soil bacteria to *Lyophyllum* sp.  
606 strain Karsten in soil microcosms. Appl Environ Microbiol 75:2820–2830.
- 607 47. Kirner S, Krauss S, Sury G, Lam ST, Ligon JM, van Pee K-H. 1996. The non-haem  
608 chloroperoxidase from *Pseudomonas fluorescens* and its relationship to pyrrolnitrin  
609 biosynthesis. Microbiology 142:2129–2135.
- 610 48. Monds RD, Newell PD, Schwartzman JA, O'Toole GA. 2006. Conservation of the Pho

- 611 regulon in *Pseudomonas fluorescens* Pf0-1. Appl Environ Microbiol 72:1910–1924.
- 612 49. Horton RM, Hunt HD, Ho SN, Pullen JK, Pease LR. 1989. Engineering hybrid genes  
613 without the use of restriction enzymes: gene splicing by overlap extension. Gene 77:61–  
614 68.
- 615 50. Hunnicutt DW, McBride MJ. 2000. Cloning and characterization of the *Flavobacterium*  
616 *johnsoniae* gliding-motility genes *gldB* and *gldC*. J Bacteriol 182:911–918.
- 617 51. Caetano-Anollés G. 1993. Amplifying DNA with arbitrary oligonucleotide primers. PCR  
618 Methods Appl 3:85–94.
- 619 52. O'Toole GA, Pratt LA, Watnick PI, Newman DK, Weaver VB, Kolter R. 1999. Genetic  
620 approaches to study of biofilms. Methods Enzymol 310:91–109.
- 621 53. Simon R, Priefer U, Puhler A. 1983. A broad host range mobilization system for *in vivo*  
622 genetic engineering: transposon mutagenesis in gram negative bacteria. Nat Biotechnol  
623 1:784–791.
- 624 54. Compeau G, Al-Achi BJ, Platsouka E, Levy SB. 1988. Survival of rifampin-resistant  
625 mutants of *Pseudomonas fluorescens* and *Pseudomonas putida* in soil systems. Appl  
626 Environ Microbiol 54:2432–2438.
- 627 55. de Boer W, Verheggen P, Klein Gunnewiek PJA, Kowalchuk GA, van Veen JA. 2003.  
628 Microbial community composition affects soil fungistasis. Appl Environ Microbiol 69:835–  
629 844.
- 630 56. Bao Y, Lies DP, Fu H, Roberts GP. 1991. An improved Tn7-based system for the single-  
631 copy insertion of cloned genes into chromosomes of gram-negative bacteria. Gene  
632 109:167–168.

633 **Tables**

634 **Table 1. Bacterial strains and Plasmids**

| <b>Strain</b>                            | <b>Genotype or Description</b>                                                                                                                  | <b>Source or Reference</b> |
|------------------------------------------|-------------------------------------------------------------------------------------------------------------------------------------------------|----------------------------|
| <b><i>E. coli</i></b>                    |                                                                                                                                                 |                            |
| S17-1                                    | <i>recA thi pro hsdR</i> RP4-2-Tc::Mu-Km::Tn7 $\lambda$ pir Sm <sup>r</sup> Tp <sup>r</sup>                                                     | (53)                       |
| <b><i>P. fluorescens</i></b>             |                                                                                                                                                 |                            |
| Pf0-1                                    | Wild type, Ap <sup>r</sup>                                                                                                                      | (54)                       |
| Pf0-ecfp                                 | Pf0-1::mini-Tn7 <i>ecfp</i> Gm <sup>r</sup>                                                                                                     | This study                 |
| <b><i>Pedobacter</i></b>                 |                                                                                                                                                 |                            |
| V48                                      | Wild type                                                                                                                                       | (55)                       |
| V48- <i>dsRed</i>                        | V48 N824_RS25465T899:: <i>HimarEm1</i> <i>PompA-dsRedEXPRESS</i> Em <sup>r</sup><br>NCBI Accession: NZ_AWRU00000000.1, as of September 25, 2017 | This study                 |
| <b>Plasmids</b>                          |                                                                                                                                                 |                            |
| pUC18T-mini-Tn7T-Gm- <i>dsRedEXPRESS</i> | Gm <sup>r</sup>                                                                                                                                 | (21)                       |
| pUC18T-mini-Tn7T-Gm- <i>ecfp</i>         | Gm <sup>r</sup>                                                                                                                                 | (21)                       |
| pUX-BF13                                 | R6K replicon-based helper plasmid carrying Tn7 transposase genes                                                                                | (56)                       |
| pHimarEm1                                | Plasmid carrying <i>HimarEm1</i> ; Km <sup>r</sup> (Em <sup>r</sup> )                                                                           | (23)                       |
| pHimarEm1- <i>dsRed</i>                  | pHimarEm1 $\Omega$ (3.529kb:: <i>PompA-dsRedEXPRESS</i> )                                                                                       | This study                 |

635 **Table 2. Primers**

| <b>Primers</b>        | <b>Sequence (5'-3')</b>                         | <b>Purpose</b>                                                                                         | <b>Source or Reference</b> |
|-----------------------|-------------------------------------------------|--------------------------------------------------------------------------------------------------------|----------------------------|
| Tn7 F                 | 5'-CAGCATAACTGGACTGATTTTCAG - 3'                | Verify integration of transposon into chromosomal <i>glmS</i> locus                                    | (48)                       |
| <i>glmS</i> R         | 5'-TGCTCAAGGGCACTGACG-3'                        | "                                                                                                      | (48)                       |
| <i>PompA-dsRed</i> F  | 5'ACGTTCTCGGAGGAGGCCATCAAC GCAACAAAAGAACTGC 3'  | Amplification of N824_RS25200 promoter to join with <i>dsRed</i> gene                                  | This study                 |
| <i>PompA</i> R        | 5'-TATGGTACC AGTCATCTAGGCGGCTGTAG-3'            | "<br>Includes KpnI-site for inserting into pHimarEm1                                                   | This study                 |
| <i>dsRed</i> F        | 5'-TACTCAGGAGAGCGTTCACC-3'                      | Amplification of <i>dsRed</i> gene with no promoter, to join with V48 N824_RS25200 promoter by SOE PCR | This study                 |
| <i>dsRed</i> R        | 5'- GCAGTTTCTTTTGTTCGTTGATGGC CTCTCCGAGAACGT-3' | "<br>Includes KpnI-site for inserting into pHimarEm1                                                   | This study                 |
| pHimar KpnI-flank F   | 5'-CTGCCCTGCAATCGACCTCG-3'                      | Verify ligation of <i>dsRed</i> into pHimarEm1                                                         | This study                 |
| pHimar KpnI-flank R   | 5'-CAGATAGCCCAGTAGCTGAC-3'                      | "                                                                                                      | This study                 |
| <i>erm</i> F          | 5'-CCGCACCCAAAAGTTGCAT-3'                       | Verify integration of transposon into V48 chromosome.                                                  | This study                 |
| <i>erm</i> R          | 5'-GACAATGGAACCTCCCAGAA-3'                      | "                                                                                                      | This study                 |
| ARB1                  | 5'- GGCCACGCGTCGACTAGTACNNNNN NNNNGATAT-3'      | Find location of transposon integration in V48 chromosome.                                             | (52)                       |
| ARB6                  | 5'- GGCCACGCGTCGACTAGTACNNNNN NNNNACGCC-3'      | "                                                                                                      | (52)                       |
| ARB2                  | 5'-GGCCACGCGTCGACTAGTAC -3'                     | "                                                                                                      | (52)                       |
| Himar Arb1 (TnExt)    | 5'-GTGTTGTTCCAGTTTGAGATC-3'                     | "                                                                                                      | This study                 |
| Himar609 Arb2 (TnInt) | 5'-TGGGAATCATTTGAAGGTTGG-3'                     | "                                                                                                      | (23)                       |
